# Supplementary material for: As(iii) adsorption–oxidation behavior and mechanisms on Cr(vi)-incorporated schwertmannite
Source: Royal Society of Chemistry journal article supplement (doi:10.1039/d1en00104c), 2021-01-01
Supplement: d1en00104c1.pdf [file d1en00104c1.pdf]

## Supplementary materials

### **As(III) adsorption-oxidation behavior and mechanisms on Cr(VI)-incorporated schwertmannite**

Hong Ying<sup>a</sup>, Kun Huang<sup>a</sup>, Xionghan Feng<sup>a</sup>, Yupeng Yan<sup>b</sup>, Mengqiang Zhu<sup>c</sup>, Zimeng  
Wang<sup>d</sup>, Qiaoyun Huang<sup>a</sup>, Xiaoming Wang<sup>a,\*</sup>

<sup>a</sup>Key Laboratory of Arable Land Conservation (Middle and Lower Reaches of Yangtze River), Ministry of Agriculture and Rural Affairs, State Environmental Protection Key Laboratory of Soil Health and Green Remediation, College of Resources and Environment, Huazhong Agricultural University, Wuhan 430070, China

<sup>b</sup>Key Laboratory of Poyang Lake Basin Agricultural Resource and Ecology of Jiangxi Province, College of Land Resource and Environment, Jiangxi Agricultural University, Nanchang 330045, China

<sup>c</sup>Department of Ecosystem Science and Management, University of Wyoming, Laramie, WY, 82071

<sup>d</sup>Department of Environmental Science and Engineering, Fudan University, Shanghai 200433, China

Supplementary materials include 3 tables and 8 figures.

\*Corresponding author:

Xiaoming Wang, Tel: +86 27 87280271; Fax: +86 27 87288618; E-mail:

[wangxm338@mail.hzau.edu.cn](mailto:wangxm338@mail.hzau.edu.cn)

## SI-1: The in-situ Q-XAS experimental settings

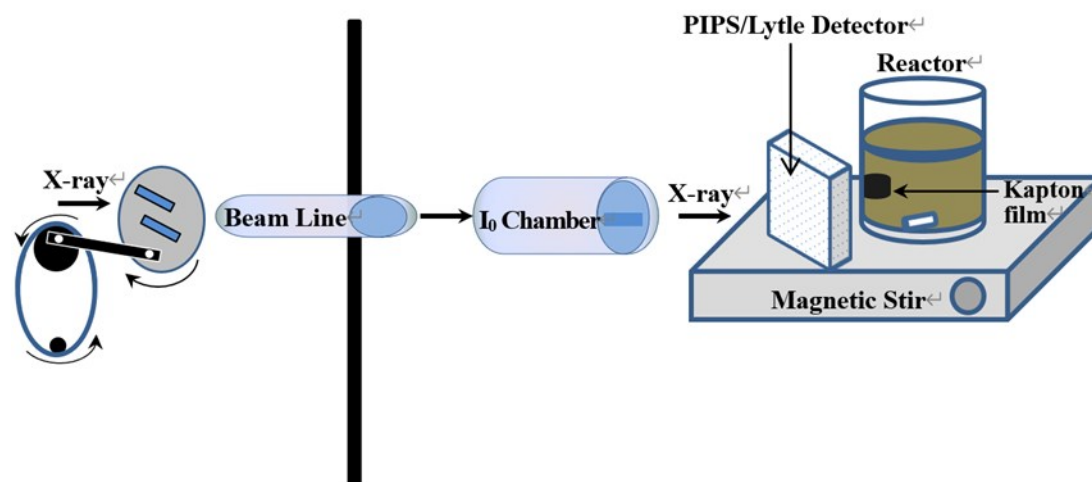

## SI-2: Sample characterization

The synthesized samples were identified by XRD using a Bruker D8 Advance X-ray Diffractometer equipped with a LynxEye detector using Ni-filtered Cu K $\alpha$  radiation ( $\lambda = 0.15418$  nm) (Bruker AXS GmbH, Karlsruhe, Germany). All XRD patterns were collected at a scan speed of  $2^\circ \cdot \text{min}^{-1}$  from  $10$  to  $70^\circ$  operated at a tube voltage of  $40$  kV and a tube current of  $40$  mA. The FTIR spectra of products, making pellets with dried KBr ( $\sim 1.25\%$  sample weight), were measured over the  $4000 - 400$   $\text{cm}^{-1}$  wavenumber range with a resolution of  $4$   $\text{cm}^{-1}$  against the air background (Bruker VERTEX 70). 128 scans were collected for each sample, and the spectral data were acquired, processed, and analyzed using the OPUS program. The specific surface areas (SSA) of the samples were measured using  $\text{N}_2$  adsorption-desorption at  $77$  K (ASAP 2460, micromeritics) after degassing  $0.1 - 0.2$  g samples at  $80^\circ \text{C}$  for  $3$  h under vacuum. In addition, a small amount of synthesized samples was deposited on a conductive plastic, then plated using a sputtering apparatus and observed by scanning electron microscopy (SU8000) at an

accelerating voltage of 10 or 20 kV. Furthermore, the different As and Cr valence proportion of some selected kinetic samples were determined using the LCF analysis of As and Cr K-edge XAS. The spectra were collected between 11.67 and 12.46 keV for As and between 5.796 and 6.588 keV for Cr, respectively, using a double crystal monochromator Si(111) in fluorescence mode at the beamline 1W2B of the BSRF. All spectra were processed using the Athena program.

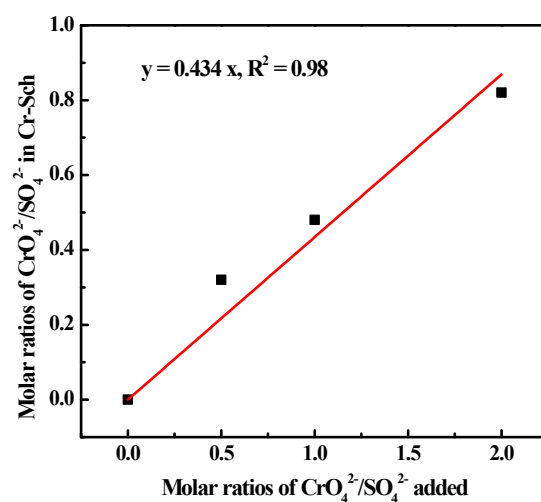

**Fig. S1.** The correlation analysis between the initial molar ratios of  $\text{CrO}_4^{2-}/\text{SO}_4^{2-}$  and the final molar ratios of  $\text{CrO}_4^{2-}/\text{SO}_4^{2-}$  in Cr(VI)-incorporated schwertmannite samples.

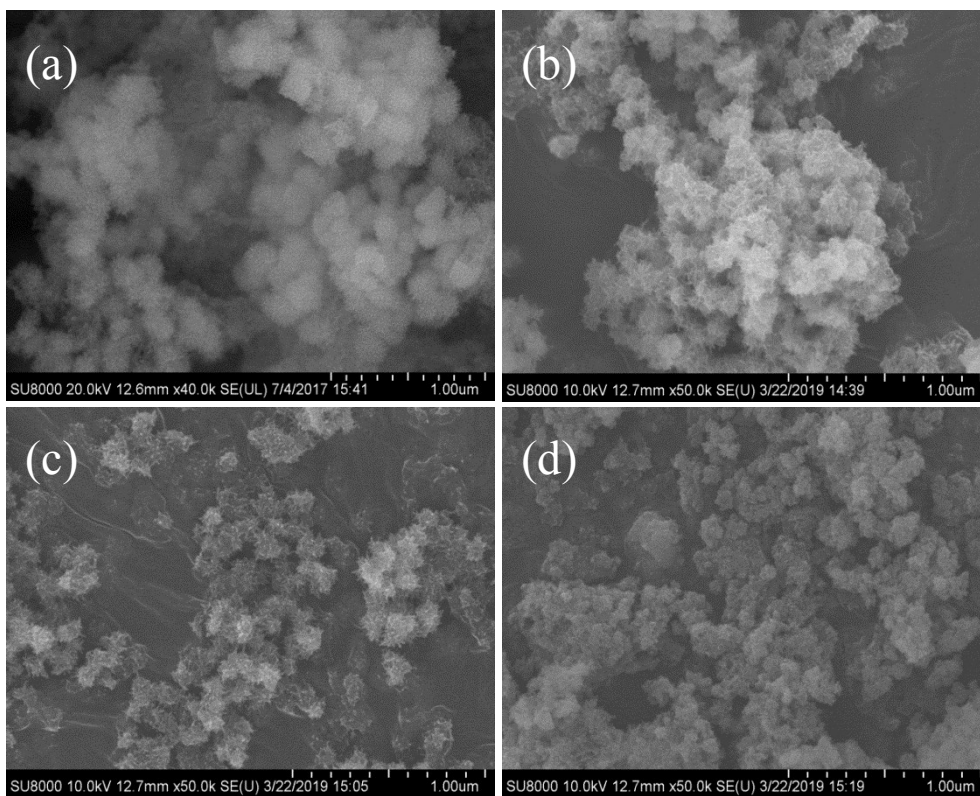

**Fig. S2.** The SEM images of Cr(VI)-incorporated schwertmannite samples obtained from  $\text{Fe}^{3+}$  hydrolysis in the presence of different molar ratios of  $\text{CrO}_4^{2-}/\text{SO}_4^{2-}$  (a:  $\text{CrO}_4^{2-}/\text{SO}_4^{2-} = 0$ ; b:  $\text{CrO}_4^{2-}/\text{SO}_4^{2-} = 0.5$ ; c:  $\text{CrO}_4^{2-}/\text{SO}_4^{2-} = 1$ ; d:  $\text{CrO}_4^{2-}/\text{SO}_4^{2-} = 2$ ).

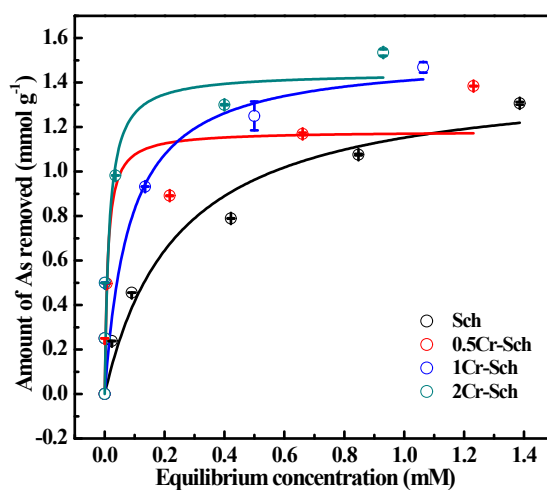

**Fig. S3.** As(III) adsorption-oxidation isotherms on Cr(VI)-incorporated schwertmannite samples at pH 5 and 0.05 M  $\text{NaNO}_3$  fitted with the Langmuir equation.

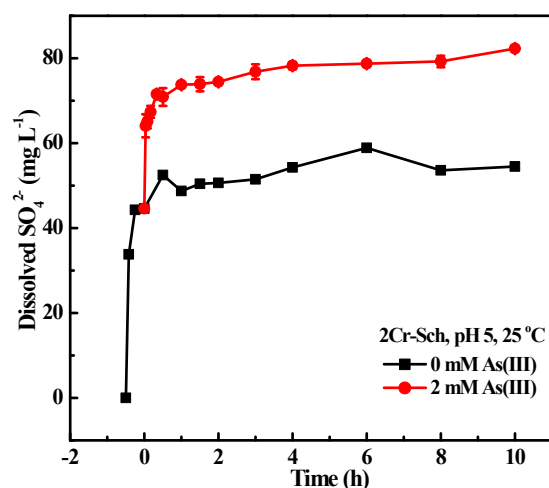

**Fig. S4.** The concentration of dissolved  $\text{SO}_4^{2-}$  during the reaction of  $2 \text{ g} \cdot \text{L}^{-1}$  Cr(VI)-incorporated schwertmannite samples with 0 mM or 2 mM As(III) at pH 5 and 25 °C. The addition of As(III) solution was set as the start point of reaction (*i.e.*, 0 h).

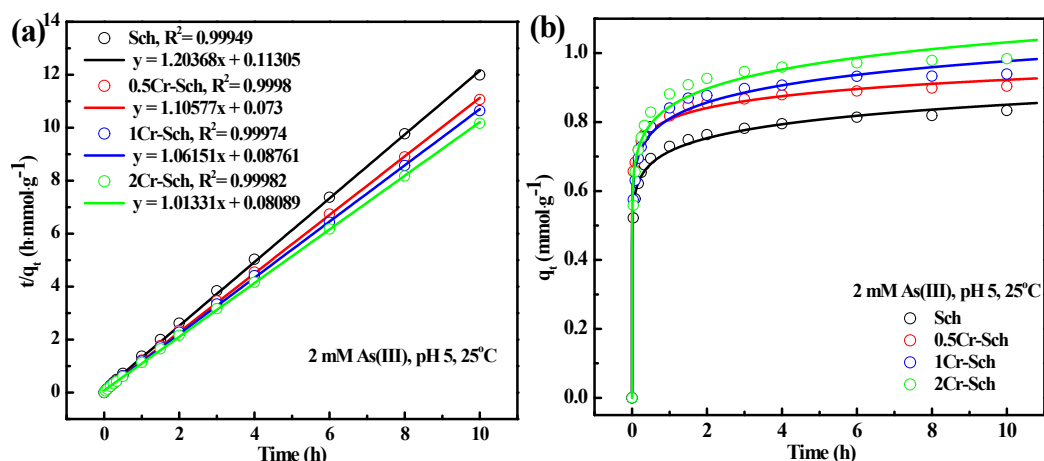

**Fig. S5.** Kinetics of 2 mM As(III) adsorption on Cr(VI)-incorporated schwertmannite at pH 5 and 25 °C fitted using the second-order kinetic equation (a) and the power function (b) (solid line). The fitted results are summarized in Table S2.

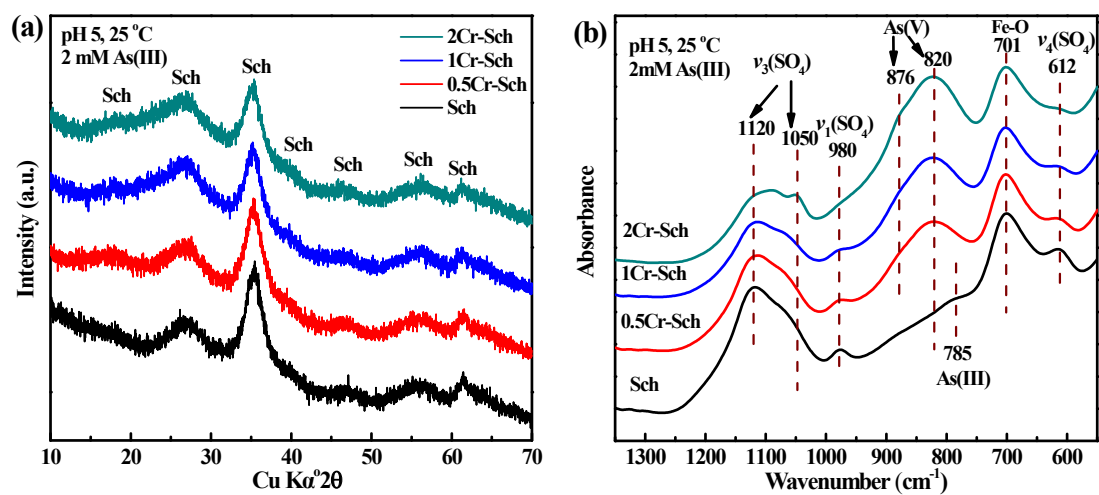

**Fig. S6.** The XRD patterns (a) and FTIR spectra (b) of final solid products after the reaction of 2 mM As(III) with 2 g·L<sup>-1</sup> Cr(VI)-incorporated schwertmannite at pH 5 and 25 °C.

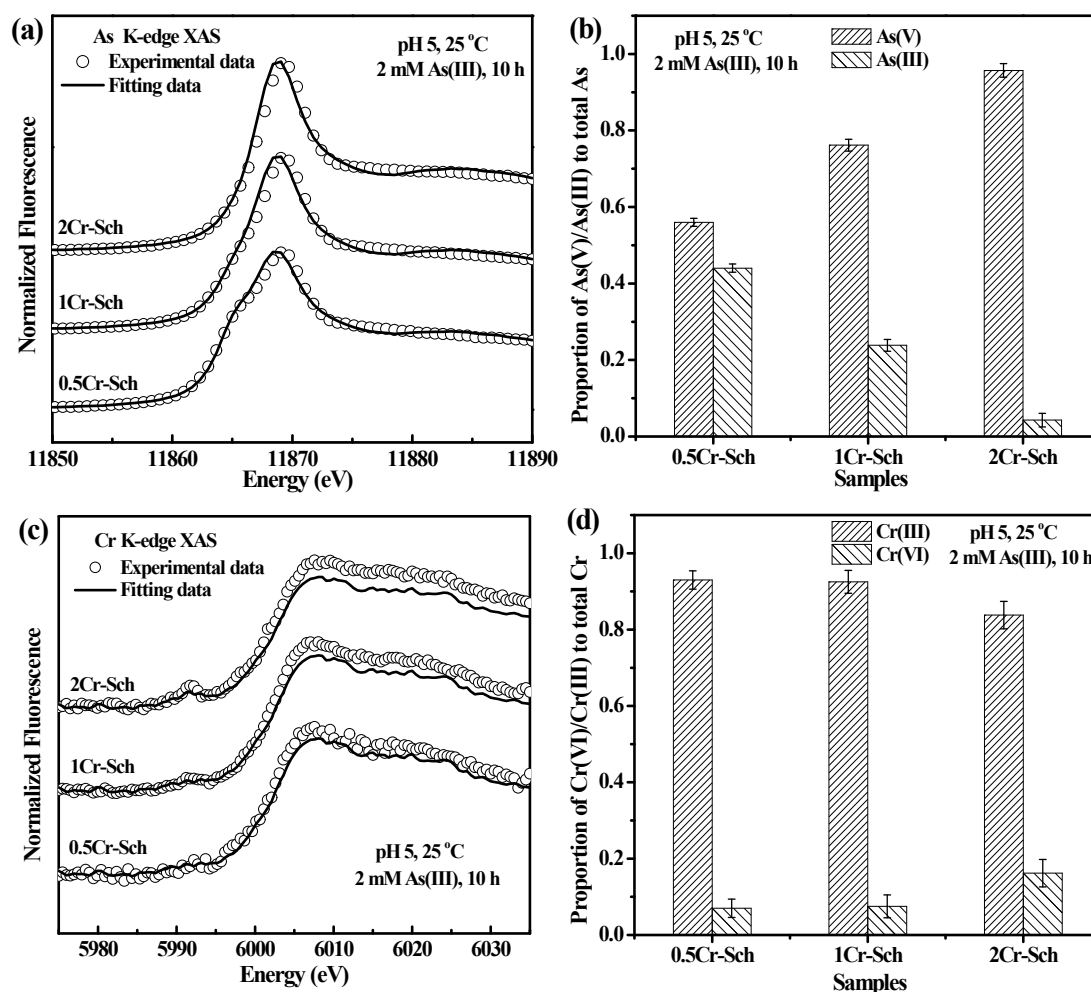

**Fig. S7.** The selected As or Cr K-edge XAS spectra of final products (a and c) and the obtained proportion of As(III) and As(V) or Cr(VI) and Cr(III) by the linear combination fitting (LCF) analysis (b and d) from 2 g·L<sup>-1</sup> Cr(VI)-incorporated schwertmannite with 2 mM As(III) at pH 5 and 25 °C.

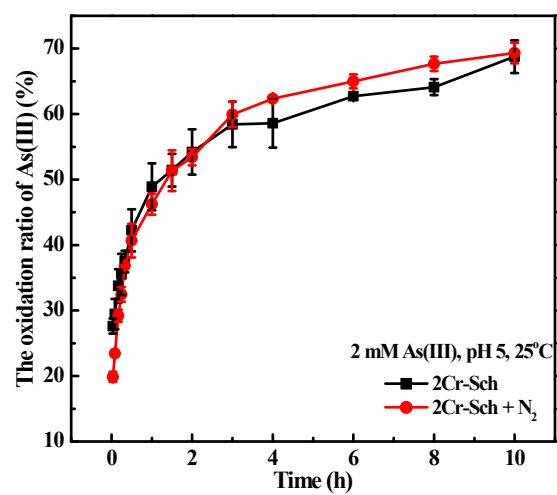

**Fig. S8.** The oxidation ratio of As(III) during the reaction of 2 g·L<sup>-1</sup> Cr(VI)-incorporated schwertmannite samples with 2 mM As(III) at pH 5 and 25 °C in air or N<sub>2</sub> atmosphere.



**Table S1.** The fitted parameters for As(III) adsorption-oxidation isotherms with Langmuir equation at pH 5 and 0.05 M NaNO<sub>3</sub>. Langmuir equation is described as  $Q_e = q_m K C_e / (1 + K C_e)$ , where  $Q_e$  (mmol/g) is the amount of As adsorbed on per unit mass,  $C_e$  (mmol·L<sup>-1</sup>) is As equilibrium concentrations,  $q_m$  (mmol/g) is As adsorption capacity, and  $K$  (L/mg) is a Langmuir constant<sup>1</sup>.

| Samples   | Langmiur                           |                           |        |
|-----------|------------------------------------|---------------------------|--------|
|           | $q_{\max}$ (mmol·g <sup>-1</sup> ) | $K$ (L·mg <sup>-1</sup> ) | $R^2$  |
| Sch       | 1.43                               | 4.09                      | 0.9681 |
| 0.5Cr-Sch | 1.18                               | 101.15                    | 0.8890 |
| 1Cr-Sch   | 1.53                               | 11.95                     | 0.8210 |
| 2Cr-Sch   | 1.44                               | 68.91                     | 0.8354 |

**Table S2.** The fitted results of As(III) adsorption kinetics on Cr(VI)-incorporated schwertmannite at pH 5 and 25 °C with the pseudo-second-order kinetic equation and the power function.

| Sample    | pseudo-second-order kinetic <sup>A</sup> |                                        |                | power function <sup>B</sup> |       |       |                |
|-----------|------------------------------------------|----------------------------------------|----------------|-----------------------------|-------|-------|----------------|
|           | K <sub>2</sub>                           | q <sub>e</sub> (mmol·g <sup>-1</sup> ) | R <sup>2</sup> | a                           | b     | K     | R <sup>2</sup> |
| Sch       | 12.82                                    | 0.83                                   | 0.9995         | 0.715                       | 0.075 | 0.054 | 0.9732         |
| 0.5Cr-Sch | 16.75                                    | 0.90                                   | 0.9998         | 0.808                       | 0.058 | 0.047 | 0.9781         |
| 1Cr-Sch   | 12.86                                    | 0.94                                   | 0.9997         | 0.900                       | 0.081 | 0.066 | 0.9528         |
| 2Cr-Sch   | 12.69                                    | 0.99                                   | 0.9998         | 0.844                       | 0.087 | 0.073 | 0.9325         |

<sup>A</sup>The pseudo-second-order kinetic equation:  $t/q_t = 1/(K_2 q_e^2) + (1/q_e) \cdot t$ , where  $q_t$  is the As adsorption amount at a given time (mmol·g<sup>-1</sup>),  $K_2$  is the rate constant of adsorption (g·mmol<sup>-1</sup>·h<sup>-1</sup>);  $q_e$  is the As adsorption amount at equilibrium (mmol·g<sup>-1</sup>); <sup>B</sup>the power function:  $q_t = a \cdot t^b$ , where  $q_t$  is the As adsorption amount at a given time (mmol·g<sup>-1</sup>),  $a$  and  $b$  are constants with  $b < 1$ .  $a \cdot b$  (K) is also a constant, being the specific adsorption rate at unit time, that is, when  $t = 1$ <sup>3</sup>.

## References

1. Y. Liao, J. Liang and L. Zhou, Adsorptive removal of As(III) by biogenic schwertmannite from simulated As-contaminated groundwater, *Chemosphere*, 2011, **83**, 295-301.
2. S. Liao, X. M. Wang, H. Yin, J. E. Post, Y. P. Yan, W. F. Tan, Q. Y. Huang, F. Liu and X. H. Feng, Effects of Al substitution on local structure and morphology of lepidocrocite and its phosphate adsorption kinetics, *Geochim. Cosmochim. Acta*, 2020, **276**, 109-121.
3. X. M. Wang, Z. M. Wang, D. Peak, Y. D. Tang, X. H. Feng and M. Q. Zhu, Quantification of coexisting inner- and outer-sphere complexation of sulfate on hematite surfaces, *ACS Earth Space Chem.*, 2018, **2**, 387-398.
